# Supplementary material
Source: publisher site journal article supplement (https://www.dovepress.com/get_supplementary_file.php?f=313067.docx)
Supplement: Supplementary file 1 [file get_supplementary_file.php]

**Appendix 1: List of Mental-Health-related and Non-Mental-Health-related Comorbidities**

| **Mental and Non-mental Comorbidities** | **ICD-9-CM Codes** | **ICD-10-CM Codes** |
| --- | --- | --- |
| **Mental-Health-related Diagnoses** |  |  |
| Attention Deficit Hyperactivity Disorder (ADHD) | 314.00, 314.9, 314.01 | F90.x |
| Panic Disorder | 300.01 | F41.0 |
| Post-traumatic stress disorder (PTSD) | 309.81 | F43.1x |
| Personality disorder | 301 | F60.0, F60.1, F60.3, F60.4, F60.81,F60.6, F60.7, F60.5, F07.0, F60.89, F60.9 |
| Anxiety | 300 | See Appendix 5: Mental-Health-Related Disorders – Anxiety disorders |
| Suicide attempt and intentional injuries | E950, E951, E952, E953, E954, E955, E956, E957, E958, E959, E800-E869, E880-E929 | X71, X72, X73, X74, X75, X76, X77, X78, X79, X80, X81, X82, X83, T14.91, T36.0X2, T36.1X2, T36.2X2, T36.3X2, T36.4X2, T36.5X2, T36.6X2, T36.7X2, T36.8X2, T36.92, T37.0X2, T37.1X2, T37.2X2, T37.3X2, T37.4X2, T37.5X2, T37.8X2, T37.92, T38.0X2, T38.1X2, T38.2X2, T38.3X2, T38.4X2, T38.5X2, T38.6X2, T38.7X2, T38.802, T38.812, T38.892, T38.902, T38.992, T39.012, T39.092, T39.1X2, T39.2X2, T39.312, T39.392, T39.4X2, T39.8X2, T39.92, T40.0X2, T40.1X2, T40.2X2, T40.3X2, T40.4X2, T40.5X2, T40.602, T40.692, T40.7X2, T40.8X2, T40.902, T40.992, T41.0X2, T41.1X2, T41.202, T41.292, T41.3X2, T41.42, T41.5X2, T42.0X2, T42.1X2, T42.2X2, T42.3X2, T42.4X2, T42.5X2, T42.6X2, T42.72, T42.8X2, T43.012, T43.022, T43.1X2, T43.202, T43.212, T43.222, T43.292, T43.3X2, T43.4X2, T43.502, T43.592, T43.602, T43.612, T43.622, T43.632, T43.692, T43.8X2, T43.92, T44.0X2, T44.1X2, T44.2X2, T44.3X2, T44.4X2, T44.5X2, T44.6X2, T44.7X2, T44.8X2, T44.902, T44.992, T45.0X2, T45.1X2, T45.2X2, T45.3X2, T45.4X2, T45.512, T45.522, T45.602, T45.612, T45.622, T45.692, T45.7X2, T45.8X2, T45.92, T46.0X2, T46.1X2, T46.2X2, T46.3X2, T46.4X2, T46.5X2, T46.6X2, T46.7X2, T46.8X2, T46.902, T46.992, T47.0X2, T47.1X2, T47.2X2, T47.3X2, T47.4X2, T47.5X2, T47.6X2, T47.7X2, T47.8X2, T47.92, T48.0X2, T48.1X2, T48.202, T48.292, T48.3X2, T48.4X2, T48.5X2, T48.6X2, T48.902, T48.992, T49.0X2, T49.1X2, T49.2X2, T49.3X2, T49.4X2, T49.5X2, T49.6X2, T49.7X2, T49.8X2, T49.92, T50.0X2, T50.1X2, T50.2X2, T50.3X2, T50.4X2, T50.5X2, T50.6X2, T50.7X2, T50.8X2, T50.A12, T50.A22, T50.A92, T50.B12, T50.B92, T50.Z12, T50.Z92, T50.902, T50.992, T51.0X2, T51.1X2, T51.2X2, T51.3X2, T51.8X2, T51.92, T52.0X2, T52.1X2, T52.2X2, T52.3X2, T52.4X2, T52.8X2, T52.92, T53.0X2, T53.1X2, T53.2X2, T53.3X2, T53.4X2, T53.5X2, T53.6X2, T53.7X2, T53.92, T54.0X2, T54.1X2, T54.2X2, T54.3X2, T54.92, T55.0X2, T55.1X2, T56.0X2, T56.1X2, T56.2X2, T56.3X2, T56.4X2, T56.5X2, T56.6X2, T56.7X2, T56.812, T56.892, T56.92, T57.0X2, T57.1X2, T57.2X2, T57.3X2, T57.8X2, T57.92, T58.02, T58.12, T58.2X2, T58.8X2, T58.92, T59.0X2, T59.1X2, T59.2X2, T59.3X2, T59.4X2, T59.5X2, T59.6X2, T59.7X2, T59.812, T59.892, T59.92, T60.0X2, T60.1X2, T60.2X2, T60.3X2, T60.4X2, T60.8X2, T60.92, T61.02, T61.12, T61.772, T61.782, T61.8X2, T61.92, T62.0X2, T62.1X2, T62.2X2, T62.8X2, T62.92, T63.002, T63.012, T63.022, T63.032, T63.042, T63.062, T63.072, T63.082, T63.092, T63.112, T63.122, T63.192, T63.2X2, T63.302, T63.312, T63.322, T63.332, T63.392, T63.412, T63.422, T63.432, T63.442, T63.452, T63.462, T63.482, T63.512, T63.592, T63.612, T63.622, T63.632, T63.692, T63.712, T63.792, T63.812, T63.822, T63.832, T63.892, T63.92, T64.02, T64.82, T65.0X2, T65.1X2, T65.212, T65.222, T65.292, T65.3X2, T65.4X2, T65.5X2, T65.6X2, T65.812, T65.822, T65.832, T65.892, T65.92, T71.112, T71.122, T71.132, T71.152, T71.162, T71.192, T71.222, T71.232, Y21, Y22, Y23, Y24, Y25, Y26, Y27, Y28, Y29, Y30, Y31, Y32, Y33, T36.0X4, T36.1X4, T36.2X4, T36.3X4, T36.4X4, T36.5X4, T36.6X4, T36.7X4, T36.8X4, T36.94, T37.0X4, T37.1X4, T37.2X4, T37.3X4, T37.4X4, T37.5X4, T37.8X4, T37.94, T38.0X4, T38.1X4, T38.2X4, T38.3X4, T38.4X4, T38.5X4, T38.6X4, T38.7X4, T38.804, T38.814, T38.894, T38.904, T38.994, T39.012, T39.092, T39.1X4, T39.2X4, T39.314, T39.394, T39.4X4, T39.8X4, T39.94, T40.0X4, T40.1X4, T40.2X4, T40.3X4, T40.4X4, T40.5X4, T40.604, T40.694, T40.7X4, T40.8X4, T40.904, T40.994, T41.0X4, T41.1X4, T41.204, T41.294, T41.3X4, T41.44, T41.5X4, T42.0X4, T42.1X4, T42.2X4, T42.3X4, T42.4X4, T42.5X4, T42.6X4, T42.74, T42.8X4, T43.014, T43.024, T43.1X4, T43.204, T43.214, T43.224, T43.294, T43.3X4, T43.4X4, T43.504, T43.594, T43.604, T43.614, T43.624, T43.634, T43.694, T43.8X4, T43.94, T44.0X4, T44.1X4, T44.2X4, T44.3X4, T44.4X4, T44.5X4, T44.6X4, T44.7X4, T44.8X4, T44.904, T44.994, T45.0X4, T45.1X4, T45.2X4, T45.3X4, T45.4X4, T45.514, T45.524, T45.604, T45.614, T45.624, T45.694, T45.7X4, T45.8X4, T45.94, T46.0X4, T46.1X4, T46.2X4, T46.3X4, T46.4X4, T46.5X4, T46.6X4, T46.7X4, T46.8X4, T46.904, T46.994, T47.0X4, T47.1X4, T47.2X4, T47.3X4, T47.4X4, T47.5X4, T47.6X4, T47.7X4, T47.8X4, T47.94, T48.0X4, T48.1X4, T48.204, T48.294, T48.3X4, T48.4X4, T48.5X4, T48.6X4, T48.904, T48.994, T49.0X4, T49.1X4, T49.2X4, T49.3X4, T49.4X4, T49.5X4, T49.6X4, T49.7X4, T49.8X4, T49.94, T50.0X4, T50.1X4, T50.2X4, T50.3X4, T50.4X4, T50.5X4, T50.6X4, T50.7X4, T50.8X4, T50.A14, T50.A24, T50.A94, T50.B14, T50.B94, T50.Z14, T50.Z94, T50.904, T50.994, T51.0X4, T51.1X4, T51.2X4, T51.3X4, T51.8X4, T51.94, T52.0X4, T52.1X4, T52.2X4, T52.3X4, T52.4X4, T52.8X4, T52.94, T53.0X4, T53.1X4, T53.2X4, T53.3X4, T53.4X4, T53.5X4, T53.6X4, T53.7X4, T53.94, T54.0X4, T54.1X4, T54.2X4, T54.3X4, T54.94, T55.0X4, T55.1X4, T56.0X4, T56.1X4, T56.2X4, T56.3X4, T56.4X4, T56.5X4, T56.6X4, T56.7X4, T56.814, T56.894, T56.94, T57.0X4, T57.1X4, T57.2X4, T57.3X4, T57.8X4, T57.94, T58.04, T58.14, T58.2X4, T58.8X4, T58.94, T59.0X4, T59.1X4, T59.2X4, T59.3X4, T59.4X4, T59.5X4, T59.6X4, T59.7X4, T59.814, T59.894, T59.94, T60.0X4, T60.1X4, T60.2X4, T60.3X4, T60.4X4, T60.8X4, T60.94, T61.04, T61.14, T61.774, T61.784, T61.8X4, T61.94, T62.0X4, T62.1X4, T62.2X4, T62.8X4, T62.94, T63.004, T63.014, T63.024, T63.034, T63.044, T63.064, T63.074, T63.084, T63.094, T63.114, T63.124, T63.194, T63.2X4, T63.304, T63.314, T63.324, T63.334, T63.394, T63.414, T63.424, T63.434, T63.444, T63.454, T63.464, T63.484, T63.514, T63.594, T63.614, T63.624, T63.634, T63.694, T63.714, T63.794, T63.814, T63.824, T63.834, T63.894, T63.94, T64.04, T64.84, T65.0X4, T65.1X4, T65.214, T65.224, T65.294, T65.3X4, T65.4X4, T65.5X4, T65.6X4, T65.814, T65.824, T65.834, T65.894, T65.94, T71.112, T71.122, T71.132, T71.152, T71.162, T71.192, T71.222, T71.232, S01, S11, S21, S31, S41, S51, S61, S71, S81, S91 |
| Tobacco use | 305.1 [Current tobacco use] and V15.82 [History of tobacco use]) | F17.200, Z87.891 |
| Bipolar disorder | 296.0x, 296.1x, 296.4x, 296.5x, 296.6x, 296.7x, 296.8x | F30.x, F31.x |
| Any depression disorder | 300.4, 296, 311 | See Appendix 5: Mental-Health-Related Disorders – Depressive Disorders |
| **Substance Abuse** |  |  |
| Alcohol | 291.x, 303.x, 305.0x, 357.5, 425.5, 535.3x, 571.0-571.3, E860.0 | F10.x, F11.1x, F11.2x, F11.20, F11.220, F11.21, F11.221, F11.222, F11.229, F11.23, F11.24, F11.250, F11.251, F11.259, F11.281, F11.282, F11.288, F11.29, F13.20, F13.220, F13.21, F13.221, F13.229, F13.230, F13.231, F13.232, F13.239, F13.24, F13.250, F13.251, F13.259, F13.26, F13.27, F13.280, F13.281, F13.282, F13.288, F13.29, F14.20, F14.220, F14.21, F14.221, F14.222, F14.229, F14.23, F14.24, F14.250, F14.251, F14.259, F14.280, F14.281, F14.288, F14.29, F12.20, F12.220, F12.221, F12.21, F12.222, F12.229, F12.250, F12.251, F12.259, F12.280, F12.288, F12.29, F15.20, F15.220, F15.21, F15.221, F15.229, F15.23, F15.24, F15.250, F15.251, F15.259, F15.280, F15.281, F15.282, F15.288, F15.29, F16.20, F15.220, F16.21, F15.221, F15.229, F15.24, F15.250, F15.251, F15.259, F15.280, F15.283, F15.288, F15.29, F19.20, F19.21, F10.10, F10.120, F10.129, F12.10, F12.90, F16.10, F16.120, F16.90, F13.10, F13.120, F13.90,F11.10, F11.120, F11.129, F11.90, F14.10, F14.120, F14.90, F15.10, F15.120, F15.90, F18.10, F18.120, F18.90, G62.1, I42.6, K29.20, K29.21, K70.0, K70.10, K70.11, K70.2, K70.30, K70.31, K70.40, K70.41, K70.9, T40.5X1A, T40.5X2A, T40.5X3A, T40.5X4A, F11-F19, T40.7X1A, T40.7X2A, T40.7X3A, T40.7X4A, T40.8X1A, T40.8X2A, T40.8X3A, T40.8X4A, T40.901A, T40.902A, T40.903A, T40.904A, T40.991A, T40.992A, T40.993A, T40.994A, T40.7X5A, T40.7X5S, T40.905A, T40.905S, T40.995A, T40.995S, T40.0X1A, T40.0X2A, T40.0X3A, T40.0X4A, T40.1X1A, T40.1X2A, T40.1X3A, T40.1X4A, T40.2X1A, T40.2X2A, T40.2X3A, T40.2X4A, T40.3X1A, T40.3X2A, T40.3X3A, T40.3X4A, T40.4X1A, T40.4X2A, T40.4X3A, T40.4X4A, T40.601A, T40.602A, T40.603A, T40.604A, T40.691A, T40.692A, T40.693A, T40.694A, T40.0X5A, T40.0X5S  F19.939, F19.950, F19.951, F15.920, F19.921, F19.97, F19.96, F19.94, F11.182, F11.282, F11.982, F13.182, F13.282, F13.982, F14.182, F14.282, F14.982, F15.182, F15.282, F15.982, F19.182, F19.282, F19.982, |
| Amphetamines | 304.4x, 305.7x |
| Cannabis | 304.3x, 305.2x |
| Cocaine | 304.2x, 305.6x, 970.81, E938.5 |
| Drug-induced mental disorders | 292.x |
| Hallucinogens | 304.5x, 305.3x, 969.6, E854.1, E939.6 |
| Opioids | 304.0x, 304.7x, 305.5x, 965.0x, E850.0, E935.0 |
| Sedatives, hypnotics, anxiolytics, tranquilizers, barbiturates | 304.1x, 305.4x |
| Combinations of drug dependence excluding opioid type drug, unspecified | 304.8 |
| Other mixed or unspecified drug abuse, unspecified | 305.9 |
| **Other Non-Mental-Health-related Diagnoses** |  |  |
| Obesity | 278.0x, 278.1x, 278.8x | E66.x, E65, E67.8 |
| Diabetes mellitus | 250.x-250.9x | E08.x, E09.x, E10.x, E11.x, E13.x |
| Metabolic syndrome | 277.7x | E88.81 |
| CVD—hyperlipidemia | 272.0x-272.4x | E78.00 - E78.2, E78.4, E78.5 |
| CVD—hypertension | 401.x-405.x | I10 - I13.x |
| CVD—coronary artery disease | 414.0x-414.3x, 414.8x, 414.9 | I20.x - I25.x, I46.x - I50.x, I60.x - I69.x, R99, Z94.1, Z95.1, Z95.5 |
| CVD—congestive heart failure | 428.0x | I50.814, E50.9 |
| HIV | 042.x-0.44.x, V08.x, 795.71 | B20, R75, Z21 |
| Hepatitis C | 70.41, 70.44, 70.51, 70.54, 070.7x, V02.6 | B17.11, B17.10, B18.2, B19.2x, Z22.50 |
| Chronic obstructive pulmonary disease | 490-492, 494, 496 | J40-J47, J60-J67, J68.4 |

All ICD-9 diagnostic and procedure codes were mapped to ICD-10 codes based on the General Equivalence Mappings (GEMs) published by Centers for Medicare and Medicaid Services (CMS). Available at https://www.cms.gov/Medicare/Coding/ICD10/index.html

**Appendix 2: List of Antipsychotics**

| **Generic Name** | **Route_of_Administration** | **Drug Class** |
| --- | --- | --- |
| Acetophenazine | OR | OAT |
| Aripiprazole Extended | IM | LAA |
| Aripiprazole | IM | SAA |
| Aripiprazole Lauroxil | IM | LAA |
| Aripiprazole | OR | OAA |
| Asenapine | SL | OAA |
| Brexpiprazole | OR | OAA |
| Cariprazine | OR | OAA |
| Chlorpromazine | OR | OAT |
| Chlorpromazine | IJ | SAT |
| Clozapine | OR | OAA |
| Fluphenazine Decanoate | IJ | LAT |
| Fluphenazine Enanthate | IJ | LAT |
| Fluphenazine | OR | OAT |
| Fluphenazine | IJ | SAT |
| Haloperidol Decanoate | IM | LAT |
| Haloperidol | IJ | SAT |
| Haloperidol | OR | OAT |
| Iloperidone | OR | OAA |
| Loxapine | OR | OAT |
| Loxapine | IM | SAT |
| Lurasidone | OR | OAA |
| Mesoridazine | OR | OAA |
| Mesoridazine | IM | SAA |
| Molindone | OR | OAT |
| Olanzapine | IM | SAA |
| Olanzapine | OR | OAA |
| Olanzapine Pamoate | IM | LAA |
| Paliperidone | IM | LAA |
| Paliperidone | OR | OAA |
| Perphenazine | OR | OAT |
| Perphenazine | IJ | SAT |
| Pimavanserin | OR | OAA |
| Promazine | IJ | SAT |
| Promazine | OR | OAT |
| Quetiapine | OR | OAA |
| Risperidone | IM | LAA |
| Risperidone | OR | OAA |
| Thioridazine | OR | OAT |
| Thiothixene | OR | OAT |
| Thiothixene | IM | SAT |
| Trifluoperazine | OR | OAT |
| Trifluoperazine | IM | SAT |
| Triflupromazine | IJ | SAT |
| Ziprasidone | OR | OAA |
| Ziprasidone | IM | SAA |

IJ: injection, IM: intramuscular, IV: intravenous, LAA: long acting injectable atypical, LAT: long acting injectable typical , OAA: oral atypical antipsychotics, OAT: oral atypical antipsychotics, OR: oral, SAA: short acting injectable atypical, SAT: short acting injectable typical, SL: sublingual

**Appendix 3: List of Antipsychotics with HCPCS codes**

| **HCPCS** | **SHORT_DESCRIPTION** |
| --- | --- |
| C9255 | Paliperidone palmitate inj |
| C9470 | Aripiprazole lauroxil im |
| C9497 | Loxapine, inhalation powder |
| J0400 | Aripiprazole injection |
| J0401 | Inj aripiprazole ext rel 1mg |
| J1630 | Haloperidol injection |
| J1631 | Haloperidol decanoate inj |
| J1942 | Aripiprazole lauroxil 1mg |
| J2358 | Olanzapine long-acting inj |
| J2426 | Paliperidone palmitate inj |
| J2680 | Fluphenazine decanoate 25 mg |
| J2794 | Risperidone, long acting |
| J2950 | Promazine hcl injection |
| J3230 | Chlorpromazine hcl injection |
| J3310 | Perphenazine injection |
| J3400 | Triflupromazine hcl inj |
| J3486 | Ziprasidone mesylate |
| Q0161 | Chlorpromazine hcl 5mg oral |
| Q0171 | Chlorpromazine |
| Q0175 | Perphenazine 4mg oral |
| S0136 | Clozapine, 25 mg |
| S0166 | Inj olanzapine 2.5mg |

**Appendix 4: Mental-Health-Related Medications**

| **Class** | **Drug** |
| --- | --- |
| **Antidepressants** | AMITRIPTYLINE EMBONATE |
| AMITRIPTYLINE HCL |
| AMITRIPTYLINE HCL & DIETARY MANAGEMENT PRODUCT |
| AMOXAPINE |
| BUPROPION HCL |
| BUPROPION HCL |
| BUPROPION HCL (SMOKING DETERRENT) |
| BUPROPION HCL ER |
| BUPROPION HCL SR |
| BUPROPION HCL-DIETARY MANAGEMENT PRODUCT |
| BUPROPION HYDROBROMIDE |
| BUPROPION XL |
| CHLORDIAZEPOXIDE-AMITRIPTYLINE |
| CITALOPRAM & DIETARY MANAGEMENT PRODUCT |
| CITALOPRAM HBR |
| CITALOPRAM HYDROBROMIDE |
| CITALOPRAM HYDROBROMIDE |
| CLOMIPRAMINE HCL |
| DESIPRAMINE DIBUDINATE |
| DESIPRAMINE HCL |
| DESVENLAFAXINE |
| DESVENLAFAXINE SUCCINATE |
| DOXEPIN HCL |
| DOXEPIN HCL (SLEEP) |
| DULOXETINE HCL |
| DULOXETINE HCL |
| EFFEXOR XR |
| ESCITALOPRAM |
| ESCITALOPRAM OXALATE |
| FLUOXETINE HCL |
| FLUOXETINE HCL (PMDD) |
| FLUOXETINE HCL-DIETARY MANAGEMENT PRODUCT |
| FLUVOXAMINE MALEATE |
| IMIPRAMINE HCL |
| IMIPRAMINE PAMOATE |
| ISOCARBOXAZID |
| LUVOX CR |
| MAPROTILINE HCL |
| MIRTAZAPINE |
| NEFAZODONE HCL |
| NORTRIPTYLINE HCL |
| OLANZAPINE-FLUOXETINE HCL |
| PAROXETINE HCL |
| PAROXETINE MESYLATE |
| PAROXETINE MESYLATE (VASOMOTOR) |
| PAXIL CR |
| PERPHENAZINE W/ AMITRIPTYLINE-DIAZEPAM |
| PERPHENAZINE-AMITRIPTYLINE |
| PERPHENAZINE-NORTRIPTYLINE |
| PEXEVA |
| PHENELZINE SULFATE |
| PHENELZINE SULFATE |
| PROTRIPTYLINE HCL |
| PROZAC WEEKLY |
| REMERON |
| SARAFEM |
| SELEGILINE |
| SELEGILINE HCL |
| SELFEMRA |
| SERTRALINE HCL |
| TOFRANIL PM |
| TRANYLCYPROMINE SULFATE |
| TRANYLCYPROMINE SULFATE |
| TRAZODONE HCL |
| TRAZODONE HCL-DIETARY MANAGEMENT PRODUCT |
| TRIMIPRAMINE |
| TRIMIPRAMINE MALEATE |
| VENLAFAXINE HCL |
| VENLAFAXINE HCL |
| VENLAFAXINE HCL ER |
| VIVACTIL |
| WELLBUTRIN |
| WELLBUTRIN SR |
| WELLBUTRIN XL |
| ZELAPAR |
| ZOLOFT |
| ZYBAN |
| AGOMELATINE |
| AMINEPTINE HCL |
| BUTRIPTYLINE HCL |
| DIBENZEPIN HCL |
| DOTHIEPIN HCL |
| LEVOMILNACIPRAN |
| LEVOMILNACIPRAN HCL |
| LOFEPRAMINE HCL |
| MIANSERIN HCL |
| MOCLOBEMIDE |
| NOMIFENSINE MALEATE |
| REBOXETINE MESYLATE |
| RESERVE 3 |
| TIANEPTINE SODIUM |
| VILAZODONE HCL |
| VILOXAZINE HCL |
| VORTIOXETINE HBR |
| **Anxiolytics** | ALPRAZOLAM |
| ALPRAZOLAM INTENSOL |
| ALPRAZOLAM XR |
| ALPRAZOLAM-DIETARY MANAGEMENT PRODUCT |
| BROMAZEPAM |
| CHLORDIAZEPOXIDE |
| CHLORDIAZEPOXIDE HCL |
| CHLORDIAZEPOXIDE HCL |
| CHLORDIAZEPOXIDE-DESIPRAMINE |
| CLONAZEPAM |
| CLORAZEPATE DIPOTASSIUM |
| CLORAZEPATE DIPOTASSIUM |
| CLOXAZOLAM |
| DIAZEPAM |
| DIAZEPAM (ANTICONVULSANT) |
| DIAZEPAM-DIETARY MANAGEMENT PRODUCT |
| ESTAZOLAM |
| FLUNITRAZEPAM |
| FLURAZEPAM HCL |
| FLURAZEPAM HCL |
| HALAZEPAM |
| KETAZOLAM |
| KLONOPIN |
| LOPRAZOLAM MESYLATE |
| LORAZEPAM |
| LORAZEPAM |
| LORAZEPAM INTENSOL |
| LORMETAZEPAM |
| MIDAZOLAM |
| MIDAZOLAM HCL |
| MIDAZOLAM HCL-SODIUM CHLORIDE |
| MIDAZOLAM MALEATE |
| NIRAVAM |
| NITRAZEPAM |
| OXAZEPAM |
| PRAZEPAM |
| QUAZEPAM |
| TEMAZEPAM |
| TEMAZEPAM-DIETARY MANAGEMENT PRODUCT |
| TETRAZEPAM |
| TRANXENE SD |
| TRIAZOLAM |
| XANAX |
| XANAX XR |
| BUSPIRONE HCL |
| CHLORMEZANONE |
| CLOBAZAM (ANTIANXIETY) |
| DROPERIDOL |
| ETHYL LOFLAZEPATE |
| ETIFOXINE HCL |
| HYDROXYZINE HCL |
| HYDROXYZINE PAMOATE |
| MEPROBAMATE |
| TYBAMATE |
| **Mood stabilizers** | CARBAMAZEPINE |
| CARBAMAZEPINE XR |
| CARBATROL |
| DEPAKOTE ER |
| DEPAKOTE SPRINKLE |
| DIVALPROEX SODIUM |
| DIVALPROEX SODIUM |
| DIVALPROEX SODIUM ER |
| EPITOL |
| EQUETRO |
| GABAPENTIN |
| GABAPENTIN (PHN) |
| GABAPENTIN ENACARBIL |
| GABAPENTIN-DIETARY MANAGEMENT PRODUCT |
| LAMICTAL (BLUE) |
| LAMICTAL (GREEN) |
| LAMICTAL (ORANGE) |
| LAMICTAL ODT |
| LAMOTRIGINE |
| LAMOTRIGINE |
| OXCARBAZEPINE |
| STAVZOR |
| TEGRETOL |
| TEGRETOL XR |
| TOPIRAMATE |
| TRILEPTAL |
| VALPROATE MAGNESIUM |
| VALPROATE SODIUM |
| VALPROIC ACID |
| VALPROIC ACID |
| LITHIUM |
| LITHIUM CARBONATE |
| LITHIUM CITRATE |
| LITHOBID |

**Appendix 5: Mental-Health-Related Disorders**

| **Comorbidities** | **ICD-9 CM Codes** | **ICD-10 CM codes** |
| --- | --- | --- |
| **Intellectual disabilities** |  |  |
| Intellectual disability (Intellectual developmental disorder), Unspecified intellectual disability (Intellectual developmental disorder) | 319.xx | F70, F71, F72, F73, F79, F88, F80.9, F80.0, F80.89, F80.81, F80.9, F84.0, F90.2, F90.1, F90.8, F90.9, F90.0, F81.0, F81.81, F81.2, F82, F98.4, F95.2, F95.1, F95.0, F95.8, F95.9, F89 |
| Global developmental delay, Other specified neurodevelopmental disorder | 315.8x |
| **Communication disorders** |  |
| Language disorder, Speech sound disorder, Social (pragmatic) communication disorder | 315.39 |
| Child-onset fluency disorder (stuttering) | 315.35 |
| Unspecified communication disorder | 307.9x |
| Autism spectrum disorder | 299 |
| **Attention-deficit / Hyperactivity disorder** |  |
| Attention-deficit / Hyperactivity disorder including: combined presentation, Predominantly hyperactive / impulsive presentation, Other specified attention-deficit / hyperactivity disorder, Unspecified attention-deficit / hyperactivity disorder | 314.01 |
| Attention-deficit / Hyperactivity disorder predominantly inattentive presentation | 314 |
| **Specific learning disorder** |  |
| Specific learning disorder with impairment in reading | 315 |
| Specific learning disorder with impairment in writing | 315.2x |
| Specific learning disorder with impairment in mathematics | 315.1x |
| **Motor disorders** |  |
| Developmental coordination disorder | 315.4x |
| Stereotypic movement disorder | 307.3x |
| Tourette's disorder | 307.23 |
| Persistent (chronic) motor or vocal tic disorder | 307.22 |
| Provisional tic disorder | 307.21 |
| Other specified tic disorder, Unspecified tic disorder | 307.2 |
| **Other neurodevelopmental disorders** |  |
| Unspecified neurodevelopmental disorder | 315.9x |
| **Schizophrenia spectrum and other psychotic disorders** |  |  |
| Schizotypal (personality) disorder | 301.22 | F20.x, F21, F22, F23, F25.x, F06.2, F06.0, F06.1, F53, F29 |
| Delusional disorder | 297.1x |
| Brief psychotic disorder, Other specified schizophrenia spectrum and other psychotic disorder | 298.8x |
| Schizophreniform disorder | 295.4 |
| Schizophrenia | 295.9 |
| Schizoaffective disorder: Bipolar type, Depressive type | 295.7 |
| Psychotic disorder due to another medical condition with delusions | 293.81 |
| Psychotic disorder due to another medical condition with hallucinations | 293.82 |
| Catatonia associated with another mental disorder (catatonia specifier), Catatonia due to another medical condition, Unspecified catatonia | 293.89 |
| Other specified schizophrenia spectrum and other psychotic disorder | 298.8x |
| Unspecified schizophrenia spectrum and other psychotic disorder | 298.9x |
| **Bipolar and related disorders** |  |  |
| Current or most recent episode manic, Current or most recent episode hypomanic | 296.40-296.46 | F31.10, F31.11, F31.12, F31.13, F31.2, F31.73, F31.74, F31.30, F31.31, F31.32, F31.4, F31.5, F31.75, F31.76, F31.9, F31.81, F34.0, F06.30, F31.9 |
| Current or most recent episode depressed | 296.50-296.56 |
| Current or most recent episode unspecified | 296.7x |
| Bipolar II disorder, Other specified bipolar and related disorder | 296.89 |
| Cyclothymic Disorder | 301.13 |
| Bipolar and related disorder due to another medical condition: with manic features, with manic - or hypomanic-like episodes, with mixed features; Depressive disorder due to another medical condition: with depressive features, with major depressive-like episode, with mixed features (from depressive disorders) | 293.83 |
| Unspecified bipolar and related disorder | 296.8 |
| **Depressive disorders** |  |  |
| Disruptive mood dysregulation disorder | 296.99 | F34.8, F32.0,F32.1,F32.2, F32.3,F32.4, F32.5,F32.9, F33.0,F33.1 F33.2, F33.3, F33.41, F33.42, F33.9, F34.1, N94.3, F32.8, F32.9 |
| Single episode | 296.20-296.26 |
| Recurrent episode | 296.30-296.36 |
| Persistent depressive disorder (Dysthymia) | 300.4x |
| Premenstrual dysphoric disorder | 625.4x |
| Other specified depressive disorder, Unspecified depressive disorder | 311.xx |
| **Anxiety disorders** |  |  |
| Separation anxiety disorder | 309.21 | F93.0, F94.0, F40.218, F40.228, F40.230, F40.231, F40.232, F40.233, F40.248, F40.298, F40.10, F41.0, F40.00, F40.01, F40.02, F41.1, F06.4, F41.8, F41.9 |
| Selective mutism | 312.23 |
| Specific phobia | 300.29 |
| Social anxiety disorder (Social phobia) | 300.23 |
| Panic disorder | 300.01 |
| Agoraphobia | 300.22 |
| Generalized anxiety disorder | 300.02 |
| Anxiety disorder due to another medical condition | 293.84 |
| Other specified anxiety disorder | 300.09 |
| Unspecified anxiety disorder | 300 |
| **Obsessive-compulsive and related disorders** |  |  |
| Obsessive-compulsive disorder, Hoarding disorder, Other specified obsessive-compulsive and related disorder, Unspecified obsessive-compulsive and related disorder | 300.3x | F42, F63.2, L98.1, F06.8 |
| Trichotillomania (Hair-pulling disorder) | 312.39 |
| Excoriation (Skin-picking disorder) | 698.4x |
| Obsessive-compulsive and related disorders due to another medical condition | 294.8x |
| **Trauma- and stressor-related disorders** |  |  |
| Reactive attachment disorder, Disinhibited social engagement disorder | 313.89 | F94.1, F94.2, F43.10, F43.0, F43.21, F43.22, F43.23, F43.24, F43.25, F43.20, F43.9, F43.8 |
| Posttraumatic stress disorder (includes posttraumatic stress disorder for children 6 years and younger) | 309.81 |
| Acute stress disorder | 308.3x |
| With depressed mood | 309.0x |
| With anxiety | 309.24 |
| With mixed anxiety and depressed mood | 309.28 |
| With mixed disturbance of conduct | 309.3x |
| With mixed disturbance of mood and conduct | 309.4x |
| Unspecified, Unspecified trauma-and stressor-related disorder | 309.9x |
| Other specified trauma-and stressor-related disorder | 309.89 |
| **Dissociative disorders** |  |  |
| Dissociative identity disorder | 300.14 | F44.81, F44.0, F44.1, F48.1, F44.89, F44.9 |
| Dissociative amnesia | 300.12 |
| Dissociative amnesia with dissociative fugue | 300.13 |
| Depersonalization / Derealization disorder | 300.6x |
| Other specified dissociative disorder, Unspecified dissociative disorder | 300.15 |
| **Somatic symptom and related disorder** |  |  |
| Somatic symptom disorder, Unspecified somatic symptom and related disorder | 300.82 | F45.1, F45.9, F45.21, F45.22, F44.4, F44.5, F44.6, F44.7, F54, F68.10, F45.8 |
| Illness anxiety disorder; Body dysmorphic disorder (from obsessive-compulsive and related disorders) | 300.7x |
| Conversion disorder (Functional neurological symptom disorder) | 300.11 |
| Psychological factors affecting other medical conditions | 316.xx |
| Factitious disorder (includes Factitious disorder imposed on self, Factitious disorder imposed on another) | 300.19 |
| Other specified somatic symptom and related disorder | 300.89 |
| **Feeding and eating disorders** |  |  |
| Pica | 307.52 | F98.3, F50.8, F98.21, F50.01, F50.02, F50.2, F50.9 |
| Rumination disorder | 307.53 |
| Avoidant / restrictive food intake disorder, Other specified feeding or eating disorder | 307.59 |
| Anorexia nervosa | 307.1x |
| Bulimia nervosa, Binge-eating disorder | 307.51 |
| Unspecified feeding or eating disorder | 307.5 |
| **Elimination disorders** |  |  |
| Enuresis | 307.6x | F98.0, F98.1, N39.498, R32, R15.9 |
| Encopresis | 307.7x |
| Other specified elimination disorder with urinary symptoms | 788.39 |
| Unspecified elimination disorder with urinary symptoms | 788.3 |
| Other specified or unspecified elimination disorder with fecal symptoms | 787.6 |
| **Sleep-wake disorders** |  |  |
| Insomnia disorder, Other specified type, Unspecified insomnia disorder | 780.52 | G47.00, G47.09, G47.10, G47.19, G47.8, G47.9, G47.419, G47.411, G47.429, G47.33, G47.31, R06.3, G47.37, G47.34, G47.35, G47.36, G47.21, G47.22, G47.23, G47.24, G47.26, G47.20, F51.3, F51.4, F51.5, G47.52, G25.81 |
| Hypersomnolence disorder, Other specified hypersomnolence disorder, Unspecified hypersomnolence disorder | 780.54 |
| Other specified sleep-wake disorder, Unspecified sleep-wake disorder | 780.59 |
| Narcolepsy without cataplexy but with hypocretin deficiency; Autosomal dominant cerebellar ataxia, deafness, and narcolepsy, Autosomal dominant narcolepsy, obesity, and type 2 diabetes | 347 |
| Narcolepsy with cataplexy but without hypocretin deficiency | 347.01 |
| Narcolepsy secondary to another medical condition | 347.1 |
| **Breathing-related sleep disorders** |  |
| Obstructive sleep apnea hypopnea | 327.23 |
| Idiopathic central sleep apnea | 327.21 |
| Cheyne-Stokes breathing | 786.04 |
| Central sleep apnea comorbid with opioid use | 780.57 |
| Idiopathic hypoventilation | 327.24 |
| Congenital central alveolar hypoventilation | 327.25 |
| Comorbid sleep-related hypoventilation | 327.26 |
| Delayed sleep phase type, Advanced sleep phase type, Irregular sleep-wake type, Non-24-hour sleep-wake type, Shift work type, Unspecified type | 307.45 |
| **Parasomnias** |  |
| Sleepwalking type, sleep terror type | 307.46 |
| Nightmare disorder | 307.47 |
| Rapid eye movement sleep behavior disorder | 327.42 |
| Restless legs syndrome | 333.94 |
| **Sexual dysfunctions** |  |  |
| Delayed ejaculation | 302.74 | F52.32, F52.21, F52.22, F52.31, F52.6, F52.0, F52.4, F52.8, F52.9 |
| Erectile disorder, Female sexual interest / arousal disorder | 302.72 |
| Female orgasmic disorder | 302.73 |
| Genito-pelvic pain / penetration disorder | 302.76 |
| Male hypoactive sexual desire disorder | 302.71 |
| Premature (early) ejaculation | 302.75 |
| Other specified sexual dysfunction | 302.79 |
| Unspecified sexual dysfunction | 302.7 |
| **Gender Dysphoria** |  |  |
| Gender dysphoria in children, Other specified gender dysphoria, Unspecified gender dysphoria | 302.6x | F64.2, F64.8, F64.9, F64.1 |
| Gender dysphoria in adolescents and adults | 302.85 |
| **Disruptive, impulse-control, and conduct disorders** |  |  |
| Oppositional defiant disorder | 313.81 | F91.3, F63.81, F91.1, F91.2, F63.2, F91.9, F91.8, F60.2, F63.1, F91.9, R45.87 |
| Intermittent explosive disorder | 312.34 |
| Childhood-onset type | 312.81 |
| Adolescent-onset type; Kleptomania | 312.32 |
| Unspecified onset; Other specified disruptive, impulse-control, and conduct disorders | 312.89 |
| Antisocial personality disorder | 301.7x |
| Pyromania | 312.33 |
| Unspecified disruptive, impulse-control, and conduct disorders | 312.9x |
| **Substance-related disorders** |  |  |
| Alcohol use disorder (mild, moderate/severe) | 305.00, 303.90 | F10.10, F10.20, F10.129, F10.229, F10.929, F10.239, F10.232, F10.99, F12.10, F12.20, F12.129, F12.229, F12.929, F12.122, F12.222, F12.922, F12.288, F12.99,F16.10, F16.20, F16.129, F16.229, F16.929, F16.983, F16.99, F18.10, F18.20, F18.129, F18.229, F18.929,F11.10, F11.20, F11.129, F11.229, F11.929, F11.122, F11.222, F11.922, F11.23, F11.99, F13.10, F13.20, F13.129, F13.229, F13.929, F13.239, F13.232, F, 13.99, F15.10, F14.10, F15.20, F14.20, F15.129, F15.229, F15.929, F14.129, F14.229, F14.929, F15.122, F15.222, F14.922, F15.23, F14.23, F15.99, F14.99, F19.10, F19.20, F19.129, F19.229, F19.929,F19.239, F19.99, |
| Alcohol intoxication | 303 |
| Alcohol withdrawal | 291.81 |
| Unspecified alcohol-related disorder | 291.9x |
| Caffeine intoxication | 305.9 |
| Cannabis use disorder (mild, moderate/severe) | 305.20, 304.30 |
| Other hallucinogen use disorder (mild, moderate/severe) | 305.30, 304.50 |
| Opioid use disorder (mild, moderate/severe) | 305.50, 304.00 |
| Sedative, hypnotic, or anxiolytic use disorder (mild, moderate/severe) | 305.40, 304.10 |
| Amphetamine-type substance use disorder, Other or unspecified stimulant use disorder (mild, moderate/severe) | 305.70, 304.40 |
| Cocaine use disorder (mild, moderate/severe) | 305.60, 304.20 |
| Tobacco use disorder | 305.1x |
| Phencyclidine, inhalant, or other (unknown) use disorder (mild) | 305.9 |
| Phencyclidine or inhalant use disorder (moderate/severe) | 304.6 |
| Other (or unknown) substance use disorder (moderate/severe) | 304.9 |
| Unspecified substance-related disorder (other than alcohol-related) | 292.9x |
| Substance-related withdrawal (other than alcohol-related) | 292.0x |
| Substance-related intoxication (other than alcohol-, caffeine-, or tobacco-related) | 292.89 |
| **Non-substance-related disorders** |  |  |
| Gambling disorder | 312.31 | F63.0 |
| **Neurocognitive disorders** |  |  |
| Medication-induced delirium | 292.81 | F05, R41.0, G31.84, G31.9, F02.81, F02.80, F01.50, F01.51, R41.9 |
| Delirium due to another medical condition, Delirium due to multiple etiologies | 293.0x |
| Other specified delirium, Unspecified delirium | 780.09 |
| **Major or mild neurocognitive disorder** |  |
| Mild neurocognitive disorder | 331.83 |
| Major neurocognitive disorder possibly due to: Alzheimer's disease, frontotemporal lobar degeneration, or Parkinson's disease, Possible major neurocognitive disorder with Lewy bodies, Possible major vascular neurocognitive disorder | 331.9x |
| Probable major neurocognitive disorder with behavioral disturbance (other than vascular neurocognitive disorder) | 294.11 |
| Probable major neurocognitive disorder without behavioral disturbance (other than vascular neurocognitive disorder) | 294.1 |
| Probable major vascular neurocognitive disorder with or without behavioral disturbance | 290.4 |
| Unspecified neurocognitive disorder | 799.59 |
| **Cluster A personality disorders** |  |  |
| Paranoid personality disorder | 301.0x | F60.0, F60.1, F60.3, F60.4, F60.81,F60.6, F60.7, F60.5, F07.0, F60.89, F60.9 |
| Schizoid personality disorder | 301.2 |
| **Cluster B personality disorders** |  |
| Borderline personality disorder | 301.83 |
| Histrionic personality disorder | 301.5 |
| Narcissistic personality disorder | 301.81 |
| **Cluster C personality disorders** |  |
| Avoidant personality disorder | 301.82 |
| Dependent personality disorder | 301.6x |
| Obsessive-compulsive personality disorder | 301.4x |
| **Other personality disorders** |  |
| Personality change due to another medical condition | 310.1x |
| Other specified personality disorder | 301.89 |
| Unspecified personality disorder | 301.9x |
| **Paraphilic disorders** |  |  |
| Voyeuristic disorder | 302.82 | F65.3, F65.2, F65.81, F65.89, F65.51, F65.52, F65.4, F65.0, F65.1, F65.9 |
| Exhibitionistic disorder | 302.4x |
| Frotteuristic disorder, Other specified paraphilic disorder | 302.89 |
| Sexual masochism disorder | 302.83 |
| Sexual sadism disorder | 302.84 |
| Pedophilic disorder | 302.2x |
| Fetishistic disorder | 302.81 |
| Transvestic disorder | 302.3x |
| Unspecified paraphilic disorder | 302.9x |
| **Other mental disorders** |  |  |
| Unspecified mental disorder due to another medical condition | 294.9x | F09, F99 |
| Other specified mental disorder, Unspecified mental disorder | 300.9x |
| **Medication-induced movement disorders and other adverse effects of medication** |  |  |
| Neuroleptic-induced Parkinsonism, Other medication-induced Parkinsonism | 332.1x | G21.11, G21.19, G21.0, G24.02, G24.09, G25.71, G25.79, G24.01, G25.1, T43.205A, T43.205D, T43.205S, T50.905A, T50.905D, T50.905S |
| Neuroleptic malignant syndrome | 333.92 |
| Medication-induced acute dystonia, Tardive dystonia | 333.72 |
| Medication-induced acute akathisia, Tardive akathisia, Other medication-induced movement disorder | 333.99 |
| Tardive dyskinesia | 333.85 |
| Medication-induced postural tremor | 333.1x |
| Antidepressant discontinuation syndrome | 995.29 |
| Other adverse effect of medication | 995.2 |
| **Relational problems** |  |  |
| Parent-child relational problems | V61.20 | Z62.820, Z62.891, Z62.29, Z63.8, Z62.898, Z63.0, Z63.5, Z63.4, T74.12XA, T74.12XD, T76.12XA, T76.12XD, T74.22XA, T74.22XD, T76.22XA, T76.22XD, T74.02XA, T74.02XD, T76.02XA, T76.02XD, T74.32XA, T74.32XD, T76.32XA, T76.32XD, Z69.010, Z69.020, Z69.011, Z62.812, Z62.811, Z91.412, Z91.411, T74.11XA, T74.11XD, T76.11XA, T76.11XD, T74.31XA, T74.31XD, T76.31XA, T76.31XD, T74.21XA, T74.21XD, T76.21XA, T76.21XD, T74.01XA, T74.01XD, T76.01XA, T76.01XD, Z69.11, Z69.81, Z69.12, Z70.9, Z69.81, Z69.82, Z69.021, Z62.810, Z91.410, Z55.9, Z56.82, Z56.9, Z59.0, Z59.1, Z59.2, Z59.3, Z59.4, Z59.5, Z59.6, Z59.7, Z59.9, Z60.0, Z65.4, Z65.8, Z64.4, R41.83V, Z60.2, Z60.3, Z60.4, Z60.5, Z65.0, Z65.1, Z65.2, Z65.3, Z64.0, Z64.1, Z65.5, Z91.82, Z60.9, Z65.9, Z71.9, Z91.49, Z91.5, Z91.89, Z72.9, Z72.811, Z72.810, Z75.3, Z75.4, Z91.19, E66.9, Z76.5, Z91.83 |
| Sibling relational problem; Upbringing away from parents; High expressed emotion level within family | V61.8x |
| Child affected by parental relationship distress | V61.29 |
| Relationship distress with spouse or intimate partner | V61.10 |
| Disruption of family by separation or divorce | V61.03 |
| Uncomplicated bereavement | V62.82 |
| **Abuse and neglect** |  |
| Child physical abuse confirmed, Child physical abuse suspected | 995.54 |
| Child sexual abuse confirmed, Child sexual abuse suspected | 995.53 |
| Child neglect confirmed, Child neglect suspected | 995.52 |
| Child psychological abuse confirmed, Child psychological abuse suspected | 995.51 |
| Encounter for mental health services for victim of child abuse or neglect by parent; Encounter for mental health services for victim of nonparental child abuse or neglect | V61.21 |
| Encounter for mental health services for perpetrator of parental child abuse or neglect | V61.22 |
| Personal history (past history) of neglect or psychological abuse in childhood; Personal history (past history) of spouse or partner neglect or psychological abuse | V15.42 |
| Adult physical violence confirmed; Adult physical violence suspected | 995.81 |
| Adult psychological abuse confirmed; Adult psychological abuse suspected | 995.82 |
| Adult sexual violence confirmed; Adult sexual violence suspected | 995.83 |
| Spouse or partner neglect confirmed; Spouse or partner neglect suspected | 995.85 |
| Encounter for mental health services for victim of spouse or partner violence or psychological abuse | V61.11 |
| Encounter for mental health services for perpetrator of spouse or partner violence or psychological abuse | V61.12 |
| Encounter for mental health services for victim of nonspousal adult abuse; Sex counseling (from other health service encounters for counseling and medical advice) | V65.49 |
| Encounter for mental health services for perpetrator of nonparental child abuse; Encounter for mental health services for perpetrator of nonspousal adult abuse | V62.83 |
| Personal history (past history) of physical or sexual abuse in childhood; Personal history (past history) of spouse or partner physical or sexual violence | V15.41 |
| **Educational and occupational problems** |  |
| Academic or educational problem | V62.3x |
| Problem related to current military deployment status | V62.21 |
| Other problem related to employment | V62.29 |
| **Housing and economic problems** |  |
| Homelessness | V60.0x |
| Inadequate housing | V60.1x |
| Discord with neighbor, lodger, or landlord | V60.89 |
| Problem related to living in a residential institution | V60.6x |
| Lack of adequate food or safe drinking water; Extreme poverty; Low income; Insufficient social insurance or welfare support | V60.2x |
| Unspecified housing or economic problem | V60.9x |
| **Other problems related to the social environment, crime, interaction with the legal system, or other psychosocial, personal, and environmental circumstances** |  |
| Phase of life problem; Victim of crime; Religious or spiritual problem; Discord with social service provider, including probation officer, case manager, or social services worker; Victim of terrorism or torture; Borderline intellectual functioning (from other circumstances of personal history) | V62.89 |
| Problem related to living alone | V60.3x |
| Acculturation difficulty, Social exclusion or rejection, Target of (perceived) adverse discrimination or persecution | V62.4x |
| Conviction in civil or criminal proceeding without imprisonment, Imprisonment or other incarceration, Problems related to release from prison, Problems related to other legal circumstances | V62.5x |
| Problems related to unwanted pregnancy | V61.7x |
| Problems related to multiparity | V61.5x |
| Exposure to disaster, war, or other hostilities; Personal history of military deployment (from other circumstances of personal history) | V62.22 |
| Unspecified problem related to social environment, Unspecified problem related to unspecified psychosocial circumstances | V62.9x |
| **Other health service encounters for counseling and medical advice** |  |
| Other counseling or consultation | V65.40 |
| **Other circumstances of personal history** |  |
| Other personal history of psychological trauma | V15.49 |
| Personal history of self-harm | V15.59 |
| Other personal risk factors | V15.89 |
| Problem related to lifestyle | V69.9x |
| Adult antisocial behavior | V71.01 |
| Child or adolescent antisocial behavior | V71.02 |
| Unavailability or inaccessibility of health care facilities | V63.9x |
| Unavailability or inaccessibility of other helping agencies | V63.8x |
| Nonadherence to medical treatment | V15.81 |
| Overweight or obesity | 278 |
| Malingering | V65.2x |
| Wandering associated with a mental disorder | V40.31 |

All ICD-9 diagnostic and procedure codes were mapped to ICD-10 codes based on the General Equivalence Mappings (GEMs) published by Centers for Medicare and Medicaid Services (CMS). Available at https://www.cms.gov/Medicare/Coding/ICD10/index.html
